# Supplementary material for: Outcome of In-Hospital Cardiac Arrest among Patients with COVID-19: A Systematic Review and Meta-Analysis
Source: MDPI journal article supplement (doi:10.3390/jcm12082796), 2023-04-10
Supplement: s1 [file s1]

## Supplementary materials

### Outcome of In-Hospital Cardiac Arrest in COVID-19 Patient: A Systematic Review and Meta-Analysis

**Dhan Bahadur Shrestha<sup>1\*</sup>, Yub Raj Sedhai<sup>2</sup>, Sagun Dawadi<sup>3</sup>, Bishal Dhakal<sup>3</sup>, Jurgen Shtembari<sup>1</sup>, Karan Singh<sup>2</sup>, Roshan Acharya<sup>2</sup>, Soney Basnyat<sup>5</sup>, Irfan Waheed<sup>2</sup>, Mohammad Saud Khan<sup>6</sup>, Mohammad Kazimuddin<sup>6</sup>, Nimesh Kirit Patel<sup>7</sup>, Gautham Kalahasty<sup>7</sup>, Prashant D. Bhawe<sup>8</sup>, S. Patrick Whalen<sup>8</sup>, Ghanshyam Shantha<sup>8\*</sup>**

- 1 Department of Internal Medicine, Mount Sinai Hospital, Chicago, IL 60608, USA
- 2 Department of Internal Medicine, Division of Pulmonary Disease and Critical Care, University of Kentucky College of Medicine-Bowling Green Campus, E 1st Ave, Bowling Green, KY 42101, USA
- 3 Department of Internal Medicine, Nepalese army institute of health sciences, Kathmandu, Nepal 44600
- 4 Division of Pulmonary Disease and Critical Care Medicine, Virginia Tech Carilion School of Medicine, Roanoke, VA, 24014
- 5 Department of Internal Medicine, University of Kentucky College of Medicine-Bowling Green Campus, E 1st Ave, Bowling Green, KY 42101, USA
- 6 Division of Cardiology, University of Kentucky College of Medicine-Bowling Green Campus, E 1st Ave, Bowling Green, KY 42101, USA
- 7 Department of Internal Medicine, Division of Cardiology, Virginia Commonwealth University, School of Medicine, Richmond, VA 23219, USA
- 8 Department of Internal Medicine, Division of Electrophysiology, Atrium Health Wake Forest Baptist Medical Center, Medical Center Boulevard, Winston-Salem, NC 27157

## Supplementary Material S1. COVID-19 IHCA search details

### PubMed

Search: ((COVID-19) OR (Coronavirus disease) OR (SARS-CoV-2) OR (severe acute respiratory syndrome coronavirus 2)) AND ((In-hospital Cardiac Arrest) OR IHCA)

Hits: 541

Link: <https://pubmed.ncbi.nlm.nih.gov/?term=%28%28COVID-19%29+OR+%28Coronavirus+disease%29+OR+%28SARS-CoV-2%29+OR+%28severe+acute+respiratory+syndrome+coronavirus+2%29%29+AND+%28%28In-hospital+Cardiac+Arrest%29+OR+IHCA%29&filter=years.2019-2022&sort=date>

### Embase

Search: ('covid 19'/exp OR 'covid 19' OR 'coronavirus disease' OR (('coronavirus'/exp OR coronavirus) AND ('disease'/exp OR disease)) OR 'sars cov 2'/exp OR 'sars cov 2' OR 'severe acute respiratory syndrome coronavirus 2'/exp OR 'severe acute respiratory syndrome coronavirus 2' OR (severe AND acute AND ('respiratory'/exp OR respiratory) AND ('syndrome'/exp OR syndrome) AND ('coronavirus'/exp OR coronavirus) AND ('2'/exp OR 2))) AND ('in-hospital cardiac arrest' OR ('in hospital' AND ('cardiac'/exp OR cardiac) AND ('arrest'/exp OR arrest)) OR ihca)

Hits: 183

Link:

<https://www.embase.com/#advancedSearch/resultspage/history.1/page.1/25.items/orderby.date/source>.

### Scopus

Search: TITLE-ABS-KEY ( ( ( covid-19 ) OR ( coronavirus AND disease ) OR ( sars-cov-2 ) OR ( severe AND acute AND respiratory AND syndrome AND coronavirus 2 ) ) AND ( ( in-hospital AND cardiac AND arrest ) OR ihca ) )

Hits: 127

Link: [https://www.scopus.com/results/results.uri?sort=plf-f&src=s&st1=%28%28COVID-19%29+OR+%28Coronavirus+disease%29+OR+%28SARS-CoV-2%29+OR+%28severe+acute+respiratory+syndrome+coronavirus+2%29%29+AND+%28%28In-hospital+Cardiac+Arrest%29+OR+IHCA%29&sid=6b128330d5732d9dc9c89dd7a6f2f8e3&sot=b&sdt=b&sl=164&s=TITLE-ABS-KEY%28%28%28COVID-19%29+OR+%28Coronavirus+disease%29+OR+%28SARS-CoV-2%29+OR+%28severe+acute+respiratory+syndrome+coronavirus+2%29%29+AND+%28%28In-hospital+Cardiac+Arrest%29+OR+IHCA%29%29&origin=searchbasic&editSaveSearch=&yearFrom=Before+1960&yearTo=Present&featureToggles=FEATURE\\_EXPORT\\_REDESIGN:0](https://www.scopus.com/results/results.uri?sort=plf-f&src=s&st1=%28%28COVID-19%29+OR+%28Coronavirus+disease%29+OR+%28SARS-CoV-2%29+OR+%28severe+acute+respiratory+syndrome+coronavirus+2%29%29+AND+%28%28In-hospital+Cardiac+Arrest%29+OR+IHCA%29&sid=6b128330d5732d9dc9c89dd7a6f2f8e3&sot=b&sdt=b&sl=164&s=TITLE-ABS-KEY%28%28%28COVID-19%29+OR+%28Coronavirus+disease%29+OR+%28SARS-CoV-2%29+OR+%28severe+acute+respiratory+syndrome+coronavirus+2%29%29+AND+%28%28In-hospital+Cardiac+Arrest%29+OR+IHCA%29%29&origin=searchbasic&editSaveSearch=&yearFrom=Before+1960&yearTo=Present&featureToggles=FEATURE_EXPORT_REDESIGN:0)

Cochrane library

Search: ((COVID-19) OR (Coronavirus disease) OR (SARS-CoV-2) OR (severe acute respiratory syndrome coronavirus 2)) AND ((In-hospital Cardiac Arrest) OR IHCA)

Hits: 4

Link: <https://www.cochranelibrary.com/advanced-search>

## Supplementary Material S2

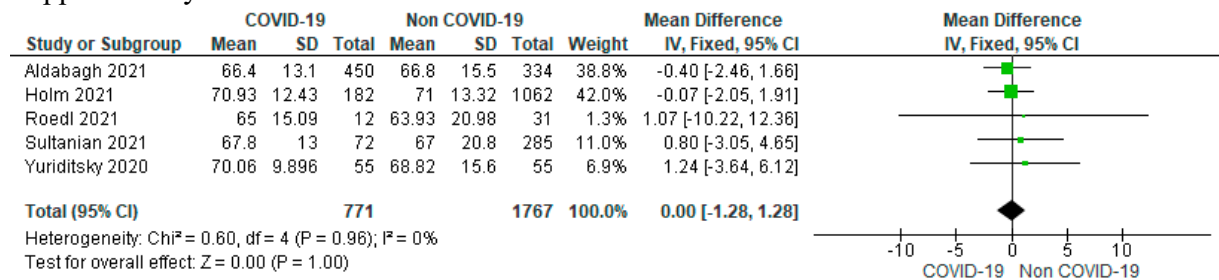

Supplementary material S2; Figure S1. Mean differences of age among patients across 5 studies between COVID-19 and non-COVID-19 patients using fixed effect model

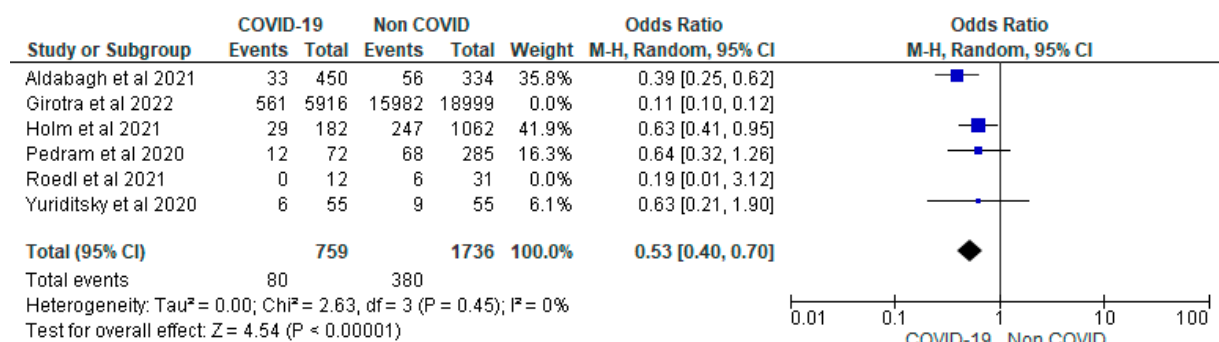

Supplementary material S2; Figure S2. Forest plot showing group difference for shockable rhythm among COVID-19 versus non-COVID-19 patient using fixed effect after excluding the outlier studies (Girotra *et al.*, Roedl *et al.*)

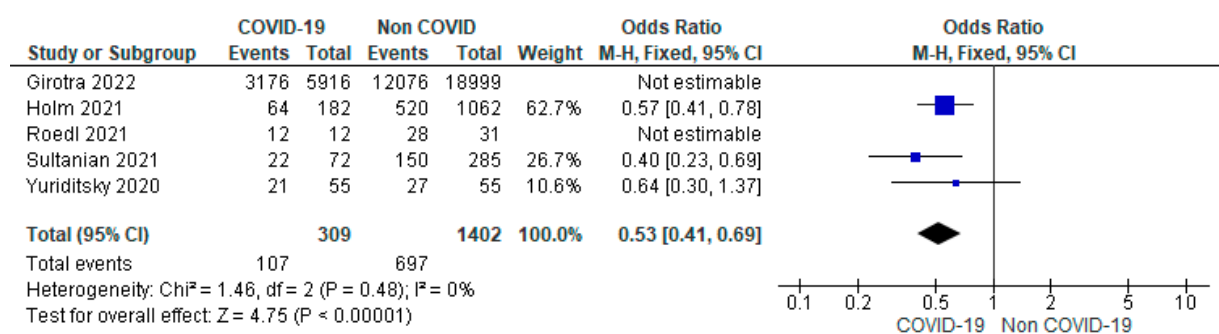

Supplementary material S2; Figure S3. Forest plot showing group differences for ROSC among COVID-19 versus non-COVID-19 patient using fixed effect model after removing outlier studies. (Girotra *et al.* and Roedl *et al.*)

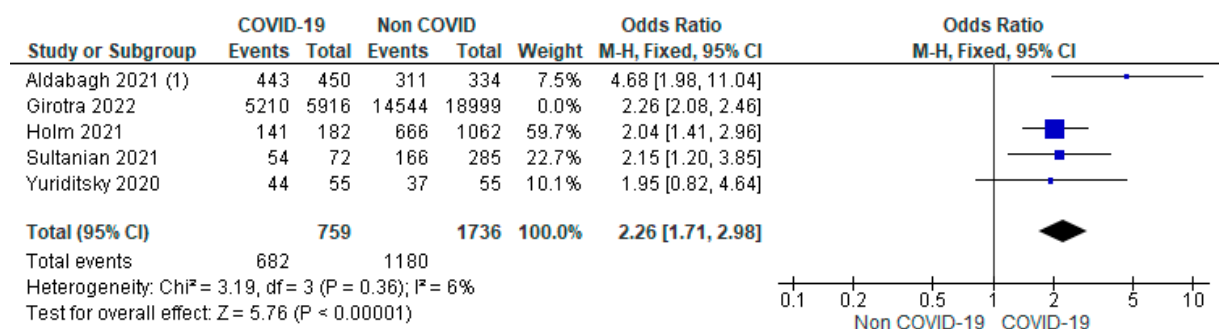

#### Footnotes

(1) In-hospital mortality (Aldabagh 2021 and Girotra 2022)

Supplementary material S2: Figure S4. Excluding Girotra *et al* for 30-day mortality among COVID-19 versus non-COVID-19 patient using fixed effect model

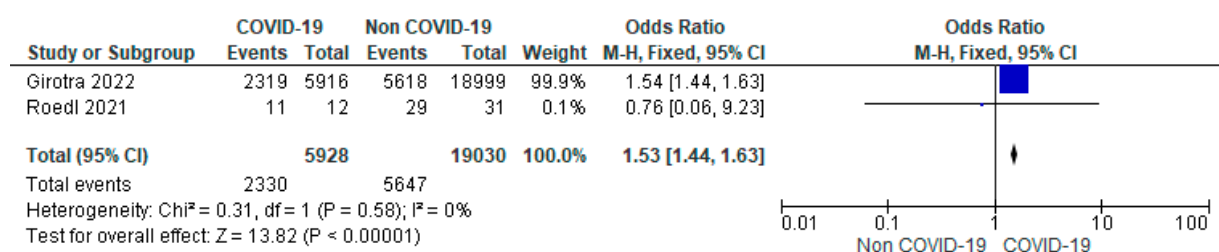

Supplementary material S2: Figure S5. Forest plot showing group differences on vasopressor use among COVID-19 versus non-COVID-19 patient using fixed effect model

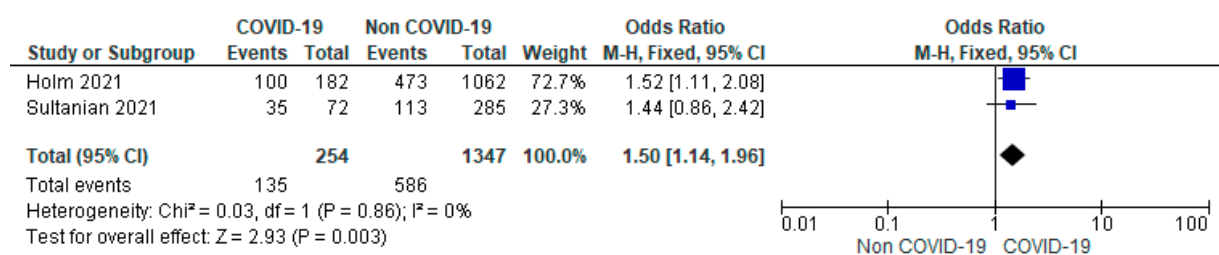

Supplementary material S2: Figure S6. Forest plot showing group differences on intubation among COVID-19 versus non-COVID-19 patient using fixed effect model

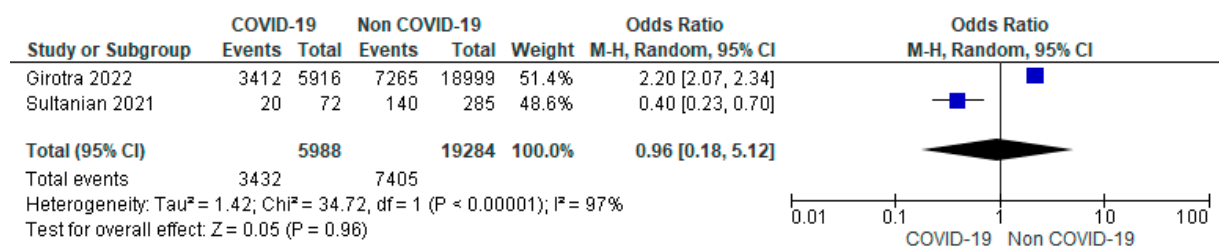

Supplementary material S2: Figure S7. Forest plot showing group difference on Mechanical Ventilation among COVID-19 versus non COVID-19 patient using Random effect model.

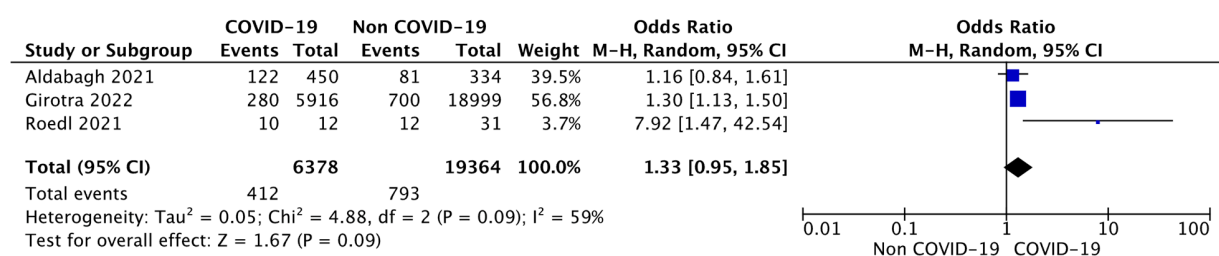

Supplementary material S2: Figure S8. Forest plot showing group difference on Renal Replacement Therapy among COVID-19 Versus non COVID-19 patient using Random effect model.

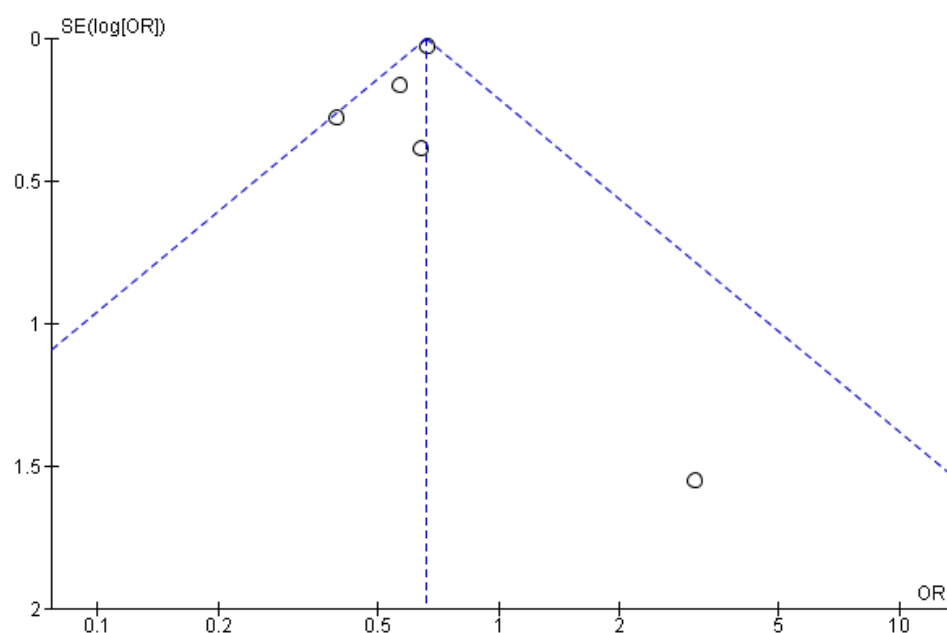

Supplementary material S2, Figure S9. Funnel plot showing publication bias for ROSC

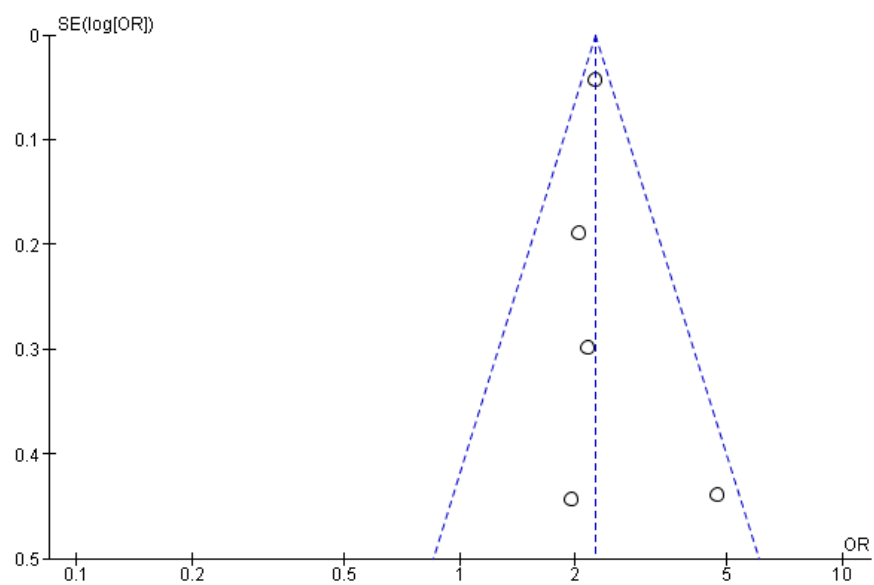

Supplementary material S2, Figure S10. Funnel plot showing publication bias for 30-day mortality

Supplementary Material S3. **MOOSE Checklist for Meta-analyses of Observational Studies**

| Item No                                     | Recommendation                                                                                                                                                                                                                                                               | Reported on Page No                |
|---------------------------------------------|------------------------------------------------------------------------------------------------------------------------------------------------------------------------------------------------------------------------------------------------------------------------------|------------------------------------|
| Reporting of background should include      |                                                                                                                                                                                                                                                                              |                                    |
| 1                                           | Problem definition                                                                                                                                                                                                                                                           | 5                                  |
| 2                                           | Hypothesis statement                                                                                                                                                                                                                                                         | -                                  |
| 3                                           | Description of study outcome(s)                                                                                                                                                                                                                                              | 6                                  |
| 4                                           | Type of exposure or intervention used                                                                                                                                                                                                                                        | 6                                  |
| 5                                           | Type of study designs used                                                                                                                                                                                                                                                   | 5                                  |
| 6                                           | Study population                                                                                                                                                                                                                                                             | 6                                  |
| Reporting of search strategy should include |                                                                                                                                                                                                                                                                              |                                    |
| 7                                           | Qualifications of searchers (eg, librarians and investigators)                                                                                                                                                                                                               | 1                                  |
| 8                                           | Search strategy, including time period included in the synthesis and key words                                                                                                                                                                                               | 6, online supplementary material 1 |
| 9                                           | Effort to include all available studies, including contact with authors                                                                                                                                                                                                      | 6                                  |
| 10                                          | Databases and registries searched                                                                                                                                                                                                                                            | 6                                  |
| 11                                          | Search software used, name and version, including special features used (eg, explosion)                                                                                                                                                                                      | 6                                  |
| 12                                          | Use of hand searching (eg, reference lists of obtained articles)                                                                                                                                                                                                             | -                                  |
| 13                                          | List of citations located and those excluded, including justification                                                                                                                                                                                                        | 8-9                                |
| 14                                          | Method of addressing articles published in languages other than English                                                                                                                                                                                                      | 7                                  |
| 15                                          | Method of handling abstracts and unpublished studies                                                                                                                                                                                                                         | 8-9                                |
| 16                                          | Description of any contact with authors                                                                                                                                                                                                                                      | -                                  |
| Reporting of methods should include         |                                                                                                                                                                                                                                                                              |                                    |
| 17                                          | Description of relevance or appropriateness of studies assembled for assessing the hypothesis to be tested                                                                                                                                                                   | 7                                  |
| 18                                          | Rationale for the selection and coding of data (eg, sound clinical principles or convenience)                                                                                                                                                                                | 7-8                                |
| 19                                          | Documentation of how data were classified and coded (eg, multiple raters, blinding and interrater reliability)                                                                                                                                                               | 7-8                                |
| 20                                          | Assessment of confounding (eg, comparability of cases and controls in studies where appropriate)                                                                                                                                                                             | 7, supplementary material 2        |
| 21                                          | Assessment of study quality, including blinding of quality assessors, stratification or regression on possible predictors of study results                                                                                                                                   | 7                                  |
| 22                                          | Assessment of heterogeneity                                                                                                                                                                                                                                                  | 7                                  |
| 23                                          | Description of statistical methods (eg, complete description of fixed or random effects models, justification of whether the chosen models account for predictors of study results, dose-response models, or cumulative meta-analysis) in sufficient detail to be replicated | 7-8                                |



|                                     |                                                                     |                                                 |
|-------------------------------------|---------------------------------------------------------------------|-------------------------------------------------|
| 24                                  | Provision of appropriate tables and graphics                        | 10-16<br>supplementary<br>materials             |
| Reporting of results should include |                                                                     |                                                 |
| 25                                  | Graphic summarizing individual study estimates and overall estimate | Fig 2-3,<br>supplementary<br>material           |
| 26                                  | Table giving descriptive information for each study included        | Table 1 and 2                                   |
| 27                                  | Results of sensitivity testing (eg, subgroup analysis)              | 10 – 16, Figs 2-3,<br>supplementary<br>material |
| 28                                  | Indication of statistical uncertainty of findings                   | -                                               |

| Item No                                 | Recommendation                                                                                                            | Reported on<br>Page No                 |
|-----------------------------------------|---------------------------------------------------------------------------------------------------------------------------|----------------------------------------|
| Reporting of discussion should include  |                                                                                                                           |                                        |
| 29                                      | Quantitative assessment of bias (eg, publication bias)                                                                    | 7, Table 1 in<br>supplementary<br>file |
| 30                                      | Justification for exclusion (eg, exclusion of non-English language citations)                                             | 7                                      |
| 31                                      | Assessment of quality of included studies                                                                                 | 7                                      |
| Reporting of conclusions should include |                                                                                                                           |                                        |
| 32                                      | Consideration of alternative explanations for observed results                                                            | 17-20                                  |
| 33                                      | Generalization of the conclusions (ie, appropriate for the data presented and within the domain of the literature review) | 19-20                                  |
| 34                                      | Guidelines for future research                                                                                            | 20                                     |
| 35                                      | Disclosure of funding source                                                                                              | 20                                     |

*From:* Stroup DF, Berlin JA, Morton SC, et al, for the Meta-analysis Of Observational Studies in Epidemiology (MOOSE) Group. Meta-analysis of Observational Studies in Epidemiology. A Proposal for Reporting. *JAMA*. 2000;283(15):2008-2012. doi: 10.1001/jama.283.15.2008.
